# Supplementary material
Source: ML conference proceedings conference paper supplement (https://openreview.net/forum?id=KRiUbM1AxC)
Supplement: supplementary_material [file attachment]

---

# Neural Topological Ordering for Computation Graphs

---

Anonymous Author(s)

Affiliation

Address

email

## Abstract

Recent works on machine learning for combinatorial optimization have shown that learning based approaches can outperform heuristic methods in terms of speed and performance. In this paper, we consider the problem of finding an optimal topological order on a directed acyclic graph with focus on the memory minimization problem which arises in compilers. We propose an end-to-end machine learning based approach for topological ordering using an encoder-decoder framework. Our encoder is a novel attention based graph neural network architecture called *Topoformer* which uses different topological transforms of a DAG for message passing. The node embeddings produced by the encoder are converted into node priorities which are used by the decoder to generate a probability distribution over topological orders. We train our model on a dataset of synthetically generated graphs called layered graphs. We show that our model outperforms, or is on-par, with several topological ordering baselines while being significantly faster on synthetic graphs with up to 2k nodes. We also train and test our model on a set of real-world computation graphs, showing performance improvements.

## 1 Introduction

Many problems in computer science amount to finding the best sequence of objects consistent with some precedence constraints. An intuitive example comes from routing problems, where we would like to find the shortest route between cities but we have requirements (i.e. for example to pick up and subsequently deliver a package) on the order in which the cities should be visited [1]. Another case is found in compiler pipelines, wherein the "cities" become operations to be executed and the constraints come from the data dependencies between these operations, such as when the result of an operation is an operand in a subsequent one. In this case, the metric to be optimized can be the run time of the compiled program, or the memory required to execute the program [2]. Common across this class of problems is their formulation in term of finding the optimal topological order of the Directed Acyclic Graph (DAG) that encodes the precedence constraints, which induces a Combinatorial Optimization [3] (CO) problem which is in general computationally hard [4].

Already from the two examples above, one can immediately grasp the relevance of such problems for industrial Operations Research, which has prompted various actors to invest in the development of efficient CO solvers; these solvers usually encapsulate heuristic methods whose design typically requires extensive use of domain-specific and problem-specific knowledge, across decades of development. In recent years, considerable interest has emerged in the possibility of replacing such handcrafted heuristics with ones learned by deep neural nets [5] (machine learning for combinatorial optimization, MLCO). As a matter of fact, both of our two examples of DAG-based CO problems have indirectly been object of study in the Machine Learning literature. References [6, 7, 8, 9] take into consideration Routing Problems, especially the Traveling Salesperson Problem (TSP) which, on account of its richness, complexity and long history of mathematical study [10], has attained the status of a standard benchmark for MLCO [8]. Conversely, less attention has been devoted to operations

sequencing likely due to the proprietary and sensitive nature of compiler workflows, which hampers the definition of public benchmarks. References [11, 12] both consider the task of optimizing the run time of a neural network’s forward pass by optimizing the ordering and device assignment of its required operations. However, in this last case the sequencing stage is only one part of a larger compiler pipeline, and as a result of this both the performance metrics and the datasets employed cannot be made available for reproduction by third parties. This makes it both hard to assess the results therein, and to draw general conclusions and guidelines for the advancement of MLCO, which still suffers from a lack of commonly accepted and standard datasets and benchmarks.

In this work, we address the problem of finding optimal topological orders in a DAG using deep learning, focusing on the compiler task of optimizing the peak local memory usage during execution. We make the following contributions:

- We present a neural framework to optimize sequences on direct acyclic graphs. Mindful of the need for scalability, we consider a non-auto-regressive (NAR) scheme for parametrizing the probability distribution of topological orders. This allows our method to attain an extremely favorable performance vs. run time tradeoff: it always outperforms fast baselines, and is only matched or outperformed by those requiring a much longer (in one case 4000x more) run time.
- We address the problem of how to perform meaningful message-passing on DAGs, a graph type which has received comparatively less attention in the literature on Graph Neural Networks. We introduce Topoformer, a flexible, attention-based architecture wherein messages can be passed between each and every pair of nodes, with a different set of learnable parameters depending on the topological relation between these.
- To test our method, we introduce an algorithm for the generation of *synthetic*, layered, Neural Net-like computation graphs, allowing any researcher to generate a dataset of *as many as desired* graphs of *any desired size*. These graphs are a more faithful model of real NN workflows, and allow us to prove our method on a much larger and varied dataset, than previous efforts [11]. To our knowledge, this is the first public algorithm of this kind. Nevertheless, we also test our method on proprietary graphs to illustrate its relevance to realistic compiler workflows.

## 2 Related work

**Machine Learning for Combinatorial optimization** Combinatorial optimization as a use case for deep learning poses interesting technical challenges. First, the combinatorial nature of the problem conflicts with the differentiable structure of modern deep neural networks; and second, the models need to be run at large scale to solve real world instances, exacerbating the challenges in training deep learning models.

Given the discrete nature of CO problems, a natural approach is to pose them as reinforcement learning (RL) problems [13]. The aim is then to learn a policy that selects the best actions to maximize a reward directly related to the optimization objective. Algorithms then differ in the way the policy is parameterized: either in an end-to-end manner where the actions directly correspond to solutions of the optimization problem [12, 6, 8], or in a hybrid manner, where the policy augments parts of a traditional solver, e.g. by replacing heuristics used in setting parameters of an algorithm, see e.g. [11, 9, 7, 2]. Our approach follows an end-to-end design philosophy, which, not having to rely on an external algorithm, affords better control of post-compile run time and facilitates application on edge devices [2]. Furthermore, RL has the advantage of being useful as a black box optimizer, when no handcrafted heuristics can be designed.

**Sequence optimization via ML** Within MLCO, much effort has been devoted to the task of predicting optimal sequences [6, 14, 15, 16]. The end-to-end nature of our method places it close to the one proposed in [6], although to the best of our knowledge, our work is the first to tackle the challenge of enforcing precedence constraints in the network predictions. As we shall see in more detail below, this generalization is non-trivial: already counting the number of topological orders belongs to the hardest class of computational problems [4]. This has to be contrasted with the fact that the number of sequences without topological constraints is simply  $n!$  for  $n$  objects. Besides, as pointed out in [8], no MLCO method has so far been able to convincingly tackle TSPs of sizes

above a few hundred nodes, when it comes to *zero-shot* generalization to unseen problem instances, i.e. when no fine tuning on the test set is done. It is also therein pointed out how an auto-regressive parametrization of the sequence (which was the method used in ref. [6]) appears to be necessary to achieve acceptable performance even at those small sizes. Conversely, in the present work we show compelling zero-shot performance on DAGs of sizes up to *thousands* of nodes, while nonetheless generating our sequences in a fully non-auto-regressive (NAR) way and maintaining a strong run time advantage over classical sequencing algorithms. Our results can then also be interpreted as cautioning against the idea of using the TSP as the sole, paradigmatic test-bed for MLCO research, as [8] remarks.

**ML for compiler optimization** The DAG sequencing task we consider is an omnipresent stage in compiler workflows, which usually also include such tasks as device assignment and operations fusion [12]. In such a setting, jointly optimizing these tasks to reduce the *run time* of a certain workflow (such as the forward pass of a Neural Net) is a common objective, which in [11, 12] is tackled with ML methods. In this work we focus on the task of minimizing the peak local memory usage during execution, which does not require a performance model or simulator as well as being relevant to applications on edge devices [2]. In [11], the ML solution leans on an existing genetic algorithm, whilst our solution is end-to-end, much like that proposed in [12]. Another characteristic of the solution proposed in [12] is the idea of interpolating between AR and NAR via an *iterative refinement* scheme, in which sequences are generated in one pass but subsequently refined during an user-defined number of subsequent passes; conversely, we generate all our sequences in a single pass. While in [11] the run time optimization is studied on both real-world and synthetic random graphs – the latter being relatively small (up to about 200 nodes), the peak memory optimization is studied only on a proprietary dataset augmented via perturbation of the node attributes. In [12] the authors train and test their method on a relatively small set of six proprietary workflows which are not disclosed to the reader, and out of those six, only the size of the largest instance is mentioned.

**Deep Graph Neural Networks** Given that our problem is specified as a DAG, it is a logical choice to parametrize our sequence-generation policy with a Graph Neural Network architecture [17]. The basic idea of every GNN architecture is to update graph and edge representations by passing messages between the graph nodes along the graph edges [18]. However, this can be too restrictive when it comes to sequence generation on DAGs. For example, nodes that come after each other in the sequence might not be linked by an edge in the graph, and therefore are unable to directly influence each other’s representation. Notice how this difficulty is another consequence of the presence of precedence constraints in our problem, which conversely was not an issue in e.g. [6] where the graph is fully connected and no constraints are present. Relatively few efforts (see e.g. [19, 20, 21]) have been devoted to devise a way to perform meaningful message passing on DAGs. As a matter of fact, the quest for expressive GNN architectures is at the center of intense theoretical investigation [22, 23].

## 3 Background

### 3.1 Topological orders and DAGs

We here introduce the mathematical background, starting with a few definitions. A partial order is an irreflexive transitive relation  $<$  between certain pairs of a set  $V$ . We call a pair  $(x, y) \in V \times V$  that is related by  $<$  comparable, and *incomparable* otherwise. A Directed Acyclic Graph (DAG)  $G = (V, E)$  is a directed graph with no directed loops. We can map a DAG  $G = (V, E)$  to a partially ordered set  $(V, <)$  where  $x < y$  if there is a directed path from node  $x$  to node  $y$ . Multiple DAGs map to the same partial order. For example, the DAGs with vertex set  $\{x, y, z\}$  and edge sets  $E = \{x \rightarrow y, y \rightarrow z\}$  and  $E' = \{x \rightarrow y, y \rightarrow z, x \rightarrow z\}$ , where  $s \rightarrow t$  denotes a directed edge from  $s$  to  $t$ , correspond to the same partial order  $x < y < z$ . We define the *transitive closure* (TC) of a DAG as the graph with most edges that has the same underlying partial order, so that there exists a directed edge  $(x, y)$  whenever  $x < y$ . Conversely, the *transitive reduction* (TR) is the graph with *least* edges that results in the same partial order. We denote the order induced by a DAG by  $<_G$ .

A topological order or sorting of a DAG  $G$  is a bijection  $\sigma : V \rightarrow \{1, \dots, |V|\}$  such that  $\sigma(x) < \sigma(y)$  whenever  $x <_G y$ . The set  $\mathcal{T}_G$  of topological orders of  $G$  is a subset of the permutation group of the vertices and coincides with total orders on  $V$  that respect  $<_G$ , called *linear extensions* of the partial

order. While there are several well-known algorithms to compute a topological order of a DAG, e.g. breadth first search and depth first search, counting the number of topological orders is one of the hardest computational problems, being  $\#P$  complete [4]. In this work we develop a general machine learning method to find a topological order that minimizes a given cost function on a DAG, which we define in the next section.

### 3.2 Peak Memory Minimization

Deciding the best way to schedule operations in a computational graph representing a neural network is a central problem in compilers [11, 12, 2]. We can associate a DAG to a computational graph in such a way that nodes represent operations ("ops"), and incoming/outgoing edges represent operands/results of these operations. Every time one executes an op, the inputs<sup>1</sup> to that op need to be in memory, and memory for the outputs needs to be allocated. Therefore, each node of the DAG carries a label  $m : V \rightarrow \mathbb{N}$  specifying the memory required to store the output of that op. A typical first step in scheduling a DAG is to identify topological orders to execute operations. Compilers for edge devices, which have limited memory, aim at choosing the optimal topological order that minimizes the peak memory footprint [2]. We focus therefore on the peak local memory usage minimization task, which can be formulated as the following combinatorial optimization problem on a labeled DAG  $G = (V, E, m)$ :

$$\min_{\sigma \in \mathcal{T}_G} \mathcal{C}(\sigma), \quad \mathcal{C}(\sigma) \equiv \max(M_1(\sigma), \dots, M_{|V|}(\sigma)), \quad (1)$$

with the definitions

$$M_t \equiv I_{t-1} + m(\sigma_t), \quad (2)$$

$$I_t = M_t - \sum_{i \in S_t} m_i, \quad S \equiv \{i : \forall (i, j) \in E, j \in \sigma_{1:t}\}, \quad (3)$$

i.e. the memory usage at time  $t$  is given by the memory usage  $I_{t-1}$  of the outputs which have not yet been consumed, at time  $t - 1$ , by downstream operations, plus the memory requirement of the output of operation  $\sigma(t)$ .  $I_t$  is in turn obtained by subtracting from  $M_t$  the memory costs of nodes whose outgoing edges only connect to already scheduled nodes, i.e. nodes whose output was only required by already scheduled operations. Naturally,  $I_0 = 0$ .

## 4 Method

We use an encoder-decoder architecture whose schematic is shown in figure 1. Our encoder is *Topoformer*, a novel GNN architecture, which derives an embedding for each node of the graph. The embeddings are used by the decoder which generates a distribution in the sequence space and finally the distribution can be converted to a sequence via different inference methods like sampling, greedy inference or beam search. Next, we describe each of the component in detail.

### 4.1 Topoformer: topologically masked attention

A Graph Neural Network (GNN) is a natural choice to encode our scheduling problem via embedding of the DAG nodes. All canonical GNN architectures operate by updating these embeddings via the aggregation of "messages" sent from the other nodes, usually in the form of some function of their own embedding [17]. Architectures mainly differ in how the set of sender nodes is constructed and the aggregation function is chosen. In a Graph Convolutional Network [24], the senders are the first neighbors of a node and the aggregation function is a weighted average, whilst in a vanilla Graph Attention Network [25], the senders are all the other nodes, but their contributions are aggregated via averaging with *learned* weights so as to account for their degree of relevance. When trying to apply such mechanisms on DAGs, a common point of contention is whether, and how in practice, the partial ordering encoded by it should reflect in the direction of travel of the messages [26, 21, 19]. While disregarding the DAG structure entirely (as one would do in a vanilla GAT), does not appear wise, it might be too restrictive when it comes to our task. For example, nodes that are next to each other in the sequence might well be incomparable, i.e. without a path for messages between them.

<sup>1</sup>We use "inputs" and "operands" interchangeably throughout the paper.

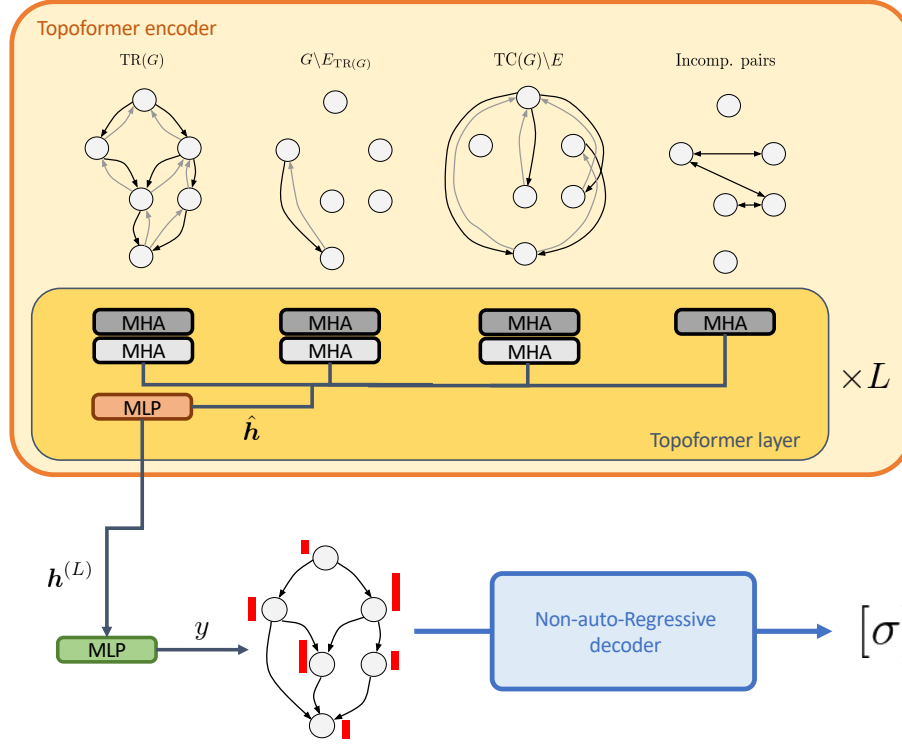

Figure 1: Our complete architecture for neural topological ordering. The shades of gray in the MHA boxes are to highlight how attentions heads operate separately on the forward and backward version of the first three graphs. The priorities  $(y_i)_{i=1}^{|V|}$  are represented by the red bars on the original DAG and decoded into a sequence with its associated probability.

188 The combinatorial nature of the task also poses requirements; it is known [22, 5] that reasoning  
 189 about CO problems on a graph requires the capacity to reason about the *global structure* of it,  
 190 whilst architectures such as those proposed in [26, 21, 19] limit the set of sender nodes to a *local*  
 191 neighborhood of the receiver node. In summary, our architecture must strike a compromise between  
 192 accounting for *global* structure and *local* partial ordering information.

193 Our *Topoformer* architecture meets these requirements. A vector  $x_i$  of input features (see the appendix  
 194 for details about its definition and dimensionality) is first turned into an initial node embedding  $h_i^{(0)}$   
 195 via a node-wise linear transformation,  $h_i^{(0)} = Wx_i + b$ . Subsequently, a succession of  $L$  attention  
 196 layers, each of them consisting of a Multi-Head Attention (MHA) [25] sub-layer followed by one  
 197 more node-wise MLP, updates these embeddings, similar to a vanilla Transformer [27]; however, we  
 198 confer a topological inductive bias to these updates by having a separate group of attention heads  
 199 masked by each of the following graphs induced by the original DAG:

- 200 • Its transitive reduction (TR).
- 201 • The directed graph obtained by removing the TR edges from the DAG:  $G \setminus E_{TR(G)}$ .
- 202 • The directed graph obtained by removing the edges of the DAG from its TC:  $TC(G) \setminus E$ .
- 203 • The backwards versions (i.e. with flipped edges) of each of the three above.
- 204 • The undirected graph obtained by joining all incomparable pairs.

205 By adding together these graphs, one would obtain the fully connected graph relative to the node  
 206 set  $V$ , whereupon all nodes would attend to all nodes. Then effectively, the propagation rules of

Topoformer are same as those of a vanilla transformer encoder,

$$\hat{\mathbf{h}}_i^{(\ell)} = \mathbf{h}_i^{(\ell-1)} + \text{concat}_j \left[ \text{MHA}_i^{\ell,j} \left( \mathbf{h}_1^{(\ell-1)}, \dots, \mathbf{h}_{|V|}^{(\ell-1)}; M^j \right) \right], \quad (4)$$

$$\mathbf{h}_i^{(\ell)} = \hat{\mathbf{h}}_i^{(\ell)} + \text{MLP}^{(\ell)} \left( \hat{\mathbf{h}}_i^{(\ell)} \right), \quad (5)$$

save for the presence of the *mask*  $M^j$ , which ensures that head  $j$  only attends to its assigned graph among the seven listed above. Following [28], we also apply layer normalization [29] to the MHA and MLP inputs. The number of heads assigned to each graph can be chosen independently (setting it to zero means to not message-pass along the edges of the respective graph), or parameters can be tied among different MHAs. One should also remark how the MLP sub-layer allows the flow of information between different attention heads. All nodes are then able to influence each other’s representation, while anyway injecting a strong inductive bias based on the DAG structure.

## 4.2 Decoder

Once the embeddings of the nodes are generated, the decoder’s task is to derive a stochastic policy  $p(\sigma|G)$  over the valid topological orders of the graph. The most straightforward way is to take advantage of the chain rule of conditional probability to decompose the policy as a product

$$p(\sigma|G) \equiv \prod_{t=2}^{|V|} p_{\theta}(\sigma_t | \sigma_{1:t-1}, \mathbf{h}, G) \times p_{\theta}(\sigma_1 | \mathbf{h}, G), \quad (6)$$

We could then sample a complete sequence by autoregressively choosing a new node at each step as done e.g. in [6]. This scheme is the most principled and expressive; however, when a NN is used as a function approximator for  $p_{\theta}$ , it also requires that  $|V|$  calls to this NN be performed, which limits its feasibility to relatively small graphs due to the amount of computation required.

This makes it acceptable to sacrifice expressivity for run time, by employing a Non-Auto-Regressive (NAR) scheme which decouples the number of NN calls from the graph size. Similar to the approach of [12], we assign scheduling *priorities*  $y_i \in \mathbb{R}$  to the nodes, rather than scheduling probabilities. The priority for node  $i$  is derived by passing its final embedding through an MLP:

$$y_i = \text{MLP} \left( \mathbf{h}_i^{(L)} \right). \quad (7)$$

These priorities are assigned with a *single* NN inference. The sequence itself is subsequently constructed by adding a new node at each step. Given the partial sequence  $\sigma_{1:i-1}$ , the next node can only be selected from a subset  $\mathcal{S}(\sigma_{1:i-1}, G)$  of schedulable nodes, due to both the graph topology and choices made earlier in the sequence. Then, the distribution of the next node to be added at step  $i$  is given as follows:

$$p(\sigma_t | \sigma_{1:t-1}, \mathbf{h}, G) = \begin{cases} \frac{\exp(y_{\sigma_t})}{\sum_{j \in \mathcal{S}(\sigma_{1:t-1}, G)} \exp(y_j)} & \text{if } \sigma_t \in \mathcal{S}(\sigma_{1:t-1}, G) \\ 0 & \text{otherwise} \end{cases}. \quad (8)$$

**Decoding methods:** We use the following three methods to obtain the next node in the partial sequence from the distribution  $p(\sigma_t | \sigma_{1:t-1}, \mathbf{h}, G)$ :

1. Greedy: At each step  $t$ , select the node with the highest probability i.e.  $\sigma_t = \arg \max_{\tilde{\sigma}_t} p(\tilde{\sigma}_t | \sigma_{1:t-1}, \mathbf{h}, G)$
2. Sampling: At each step  $t$ , sample from the next node distribution i.e.  $\sigma_t \sim p(\tilde{\sigma}_t | \sigma_{1:t-1}, \mathbf{h}, G)$
3. Beam search with state-collapsing: We can also expand the partial sequences by using a beam search method where the score function is total probability of the partial sequence. We improve our beam search routine by making the following observation: suppose there are two partial sequences in consideration,  $\sigma_{1:t}$  and  $\tilde{\sigma}_{1:t}$ , such that both have scheduled the same set of nodes so far (but different order), and  $\mathcal{C}(\sigma_{1:t}) < \mathcal{C}(\tilde{\sigma}_{1:t})$ . Then, we can ignore the partial sequence  $\tilde{\sigma}_{1:t}$  and only keep  $\sigma_{1:t}$  in the beam search. This is because both partial sequences must schedule the same set of remaining nodes, and hence the set of future memory costs are identical for both  $\sigma_{1:t}$  and  $\tilde{\sigma}_{1:t}$ , but the current peak memory cost is higher for  $\tilde{\sigma}_{1:t}$ . Thus,  $\sigma_{1:t}$  dominates  $\tilde{\sigma}_{1:t}$  in terms of achievable minimal peak memory usage.

### 247 4.3 Training

248 Our encoder-decoder architecture induces a distribution  $p_\theta(\sigma|G)$  on the set of topological orders for  
 249 a given DAG  $G$ . The expected cost incurred is given by  $J(\theta|G) = \mathbb{E}_{p_\theta(\sigma|G)} [\mathcal{C}(\sigma(\theta))]$ . We minimize  
 250 the cost  $J(\theta) = \mathbb{E}_G [J(\theta|G)]$  via gradient descent using the REINFORCE gradient estimator [30, 13]  
 251 as follows

$$\nabla J(\theta) = \mathbb{E}_{G, p_\theta(\sigma|G)} [(\mathcal{C}(\sigma) - b(G)) \nabla_\theta \log p_\theta(\sigma|G)], \quad (9)$$

252 where  $b(G)$  is a *baseline* meant to reduce the variance of the estimator. We follow [6] in setting it  
 253 equal to the cost of a *greedy rollout* of a baseline policy on the graph  $G$

$$b(G) \equiv \mathcal{C}(\arg \max_{\sigma} p_\theta(\sigma|G)). \quad (10)$$

## 254 5 Experiments

255 We conduct experiments on a synthetic dataset of graphs which we refer to as "layered graphs", as  
 256 well as a set of real-world computation graphs. We compare our approach with the following classic  
 257 topological ordering baselines:

- 258 - *Depth/Breadth first sequencing* - Find the topological order by traversing the graph in depth/breadth  
 259 first manner according to the layout of the graph generated using pygraphviz.
- 260 - *Depth-first dynamic programming (DP)*- Depth-first DP is a global depth-first method for searching  
 261 the optimal sequence, with automatic backtracking when equivalent partial sequences are found; it  
 262 retains the full sequence with minimum cost so far, and returns it if search does not complete before  
 263 the prescribed timeout.

- 264 - *Approximate DP* - In approximate DP, a beam of partial sequences are considered in parallel at  
 265 each step, and for each only the next-step option with the lowest cost is retained in the beam at  
 266 the subsequent step. This DP is also able to find the optimal sequence given enough memory and  
 267 compute resources, but here we consider only an approximate version with beam size fixed to  $10^5$ .

- 268 - *Random order* - We generate 100 random topological orders, and pick the one with smallest cost.  
 269 Please see the appendix for more detailed description of the baselines. Neural topo order Greedy,  
 270 sample and BS denote the performance of our model in greedy, sampling and beam search inference  
 271 mode respectively. We use a sample size and beam size of 16 sequences, of which the best one  
 272 is subsequently picked, for all our experiments. Next, we describe in detail the results of the two  
 273 experiments.

### 274 5.1 Layered graphs

275 In order to generate a large corpus of training data we come up with a way to synthetically generate  
 276 graphs of a given size which have similar structure to the computation graphs of feed-forward neural  
 277 networks. We call our synthetic graph family *layered graphs*, as these graphs comprise of well-defined  
 278 layers of nodes. The nodes in a layer have connections to the nodes in the subsequent layer and can  
 279 also have skip connections with nodes in layers farther down. The number of layers, number of node  
 280 per layer, number of edges between subsequent layers, number of skip connections and memory  
 281 utilization of the nodes are all generated randomly, and can be controlled by setting appropriate  
 282 parameters. We refer the reader to the appendix for more details on layered graphs, including their  
 283 generation algorithm and some visual examples.

284 We train our model on 500-node layered graphs for 325 epochs, where in each epoch we generate a  
 285 training set of 1000 new graphs. We test the performance of our model on a set of 300 unseen graphs  
 286 of the same size, generated with the same method. We also evaluate the cross-size generalization  
 287 performance of our trained model by testing it on graphs of size 1000 and 2000. We refer the reader  
 288 to the appendix for more details on the training algorithm and model configuration.

289 Figure 2 shows the performance vs. run time plot on layered graphs of size  $|V| = 500, 1000$ , and  
 290 2000. We report the performance in terms of the % gap of peak memory utilization from the peak  
 291 memory obtained via approximate DP, which we consistently observed to be the best-performing  
 292 baseline. Note that the run time is plotted on a log-scale. We can observe that for 500-node graphs,  
 293 our model beats all the baselines except approximate DP in terms of both the memory usage and run  
 294 time. Our model is slightly worse than approximate DP from the memory usage perspective, but it  
 295 runs 100x faster. We also observe that our model generalizes well to larger sized graphs. For the

case of 2000-node graphs our model performs better than approximate DP in terms of peak memory usage, while being 4000x times faster. This shows that while approximate DP performs more poorly as graph size increases, our model is able to generalize to larger graphs by learning meaningful embeddings of the topological structure thanks to Topoformer, and to be extremely fast thanks to our NAR decoding scheme.

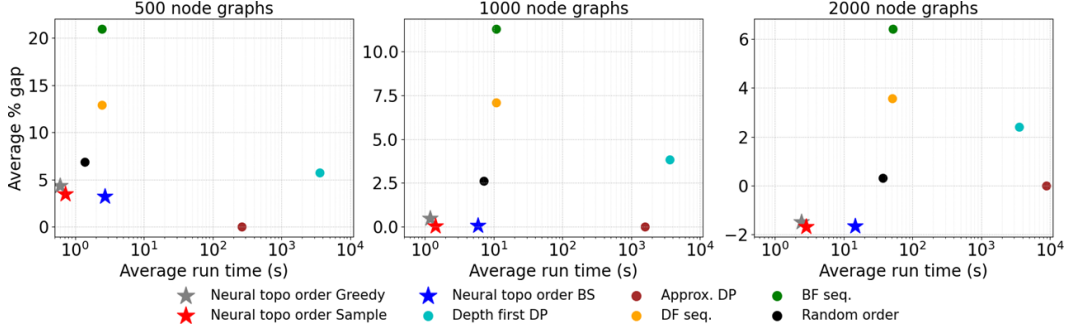

Figure 2: Average % gap from approximate DP vs average run time comparison on the test set of 300 layered graphs. Lower is better for both % gap and run time.

Table 1: Comparison of methods on the synthetic layered graph test set.

| Algorithm                        | 500- node graphs      |              | 1000-node graphs      |              | 2000-node graphs      |              |
|----------------------------------|-----------------------|--------------|-----------------------|--------------|-----------------------|--------------|
|                                  | % gap from approx. DP | run time [s] | % gap from approx. DP | run time [s] | % gap from approx. DP | run time [s] |
| Approximated DP                  | 0                     | 264.88       | 0                     | 1561.17      | 0                     | 8828.86      |
| Depth-First DP (max. runtime=1H) | 5.76                  | 3600         | 3.84                  | 3600         | 2.40                  | 3600         |
| Random order                     | 6.86                  | 1.38         | 2.62                  | 7.13         | 0.31                  | 36.87        |
| Depth-first seq.                 | 12.9                  | 2.45         | 7.1                   | 10.91        | 3.57                  | 51.32        |
| Breadth-first seq.               | 20.94                 | 2.43         | 11.31                 | 10.87        | 6.42                  | 51.52        |
| Neural Topo Order                |                       |              |                       |              |                       |              |
| ✓ Greedy                         | 4.32                  | 0.6          | 0.48                  | 1.19         | -1.47                 | 2.44         |
| ✓ Sample                         | 3.49                  | 0.72         | <b>0.03</b>           | 1.41         | <b>-1.68</b>          | 2.87         |
| ✓ Beam search                    | <b>3.21</b>           | 2.68         | 0.08                  | 5.92         | -1.66                 | 14.74        |

300

## 301 5.2 Real-world graphs

302 While our synthetic layered graphs are convenient for experimentation, we see value in also presenting  
 303 results obtained from neural computation graphs used for commercial development of our artificial  
 304 intelligence hardware and software products. Here we sample 115 representative graphs that have  
 305 diverse architectures (classifiers, language processors, denoisers, etc.) and size (from a few dozen to  
 306 1k nodes). We split this dataset into a training set and test set via a random 80 – 20 split. We train  
 307 our model for 500 epochs and report the performance on the unseen test set at the end of training in  
 308 table 2. In order to ensure fair comparison of run times, we stratify the test set into 3 categories based  
 309 on the graph size.

310 Figure 3 shows the performance vs run time plot on the test set of real graphs. We observe that  
 311 for real graphs the performance gap between the best baseline (approximate DP) and our model is  
 312 remarkable. We can obtain sequences which are 50% better than approximate DP on average while  
 313 also being almost 1000x faster on average. This proves the capability of our model to generalize and  
 314 perform well on real-world computation workflows.



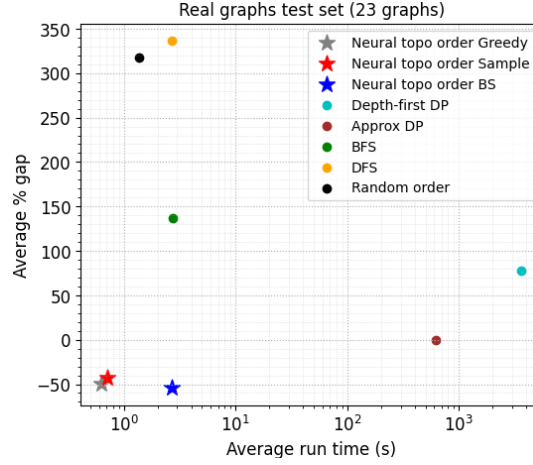

Figure 3: Performance vs run time comparison for different approaches on test set of real computation graphs. Performance is measured in average % gap from approximate DP.

Table 2: Comparison of methods on the real graph test set. Smaller % gap is better

| Algorithm                        | 200 - 500-node graphs |              | 500 - 700-node graphs |              | 700 - 1000-node graphs |              |
|----------------------------------|-----------------------|--------------|-----------------------|--------------|------------------------|--------------|
|                                  | % gap from approx. DP | run time [s] | % gap from approx. DP | run time [s] | % gap from approx. DP  | run time [s] |
| Approximated DP                  | 0                     | 113.54       | 0                     | 517.60       | 0                      | 1131.61      |
| Depth-First DP (max. runtime=1H) | 62.18                 | 3600         | 102.76                | 3600         | 50.57                  | 3600         |
| Random order                     | 469.34                | 0.25         | 376.16                | 1.24         | 116.24                 | 2.40         |
| Depth-first seq.                 | 506.21                | 0.70         | 394.93                | 2.26         | 123.21                 | 4.49         |
| Breadth-first seq.               | 348.77                | 0.75         | 149.81                | 2.31         | -35.55                 | 4.86         |
| Neural Topo Order                |                       |              |                       |              |                        |              |
| ✓ Greedy                         | -17.57                | 0.42         | -51.23                | 0.6          | -68.97                 | 0.83         |
| ✓ Sample                         | <b>-21.53</b>         | 0.44         | -40.51                | 0.68         | -61.46                 | 0.97         |
| ✓ Beam search                    | -19.5                 | 1.22         | <b>-57.34</b>         | 2.58         | <b>-73.45</b>          | 3.86         |

## 6 Conclusions

In this work we propose an end-to-end machine learning method for the task of optimizing topological orders in a directed acyclic graph. Two key elements in our design are: (1) an attention-based GNN architecture named Topoformer that employs message passing that is both global and topologically-aware in directed acyclic graphs, (2) a non-autoregressive parametrization of the distribution on topological orders that enables fast inference. We demonstrated, for both synthetic and real-world graphs, the effectiveness of the method in tackling the problem of minimizing peak local memory usage for a compute graph – a canonical task in compiler pipelines. Said pipelines also include other tasks [12], chief amongst them the one of assigning operations to devices for execution. At the present stage, our method and dataset cannot be leveraged for solving these, or for end-to-end optimization of a whole pipeline. Extending our method to this more challenging setting is therefore a natural direction for future research.

## References

- [1] P. Toth and D. Vigo, *Vehicle routing: problems, methods, and applications*. SIAM, 2014.
- [2] B. H. Ahn, J. Lee, J. M. Lin, H.-P. Cheng, J. Hou, and H. Esmailzadeh, “Ordering chaos: Memory-aware scheduling of irregularly wired neural networks for edge devices,” *Proceedings*

- of *Machine Learning and Systems*, vol. 2, pp. 44–57, 2020.
- [3] C. H. Papadimitriou and K. Steiglitz, *Combinatorial optimization: algorithms and complexity*. Courier Corporation, 1998.
- [4] G. Brightwell and P. Winkler, “Counting linear extensions is  $\#P$ -complete,” in *Proceedings Annual ACM Symposium on Theory of Computing*, 1991, p. 175–181. [Online]. Available: <https://doi.org/10.1145/103418.103441>
- [5] Y. Bengio, A. Lodi, and A. Prouvost, “Machine learning for combinatorial optimization: a methodological tour d’horizon,” *European Journal of Operational Research*, vol. 290, no. 2, pp. 405–421, 2021.
- [6] W. Kool, H. van Hoof, and M. Welling, “Attention, learn to solve routing problems!” in *International Conference on Learning Representations*, 2019. [Online]. Available: <https://openreview.net/forum?id=ByxBFsRqYm>
- [7] L. Xin, W. Song, Z. Cao, and J. Zhang, “NeuroLKH: Combining deep learning model with lin-kernighan-helsgaun heuristic for solving the traveling salesman problem,” in *Advances in Neural Information Processing Systems*, 2021. [Online]. Available: <https://openreview.net/forum?id=VKVShLsAuZ>
- [8] C. K. Joshi, Q. Cappart, L.-M. Rousseau, and T. Laurent, “Learning TSP requires rethinking generalization,” in *International Conference on Principles and Practice of Constraint Programming*, 2021.
- [9] A. Correia, D. E. Worrall, and R. Bondesan, “Neural simulated annealing,” 2022. [Online]. Available: <https://openreview.net/forum?id=bHqI0DvSIId>
- [10] W. J. Cook, *In pursuit of the traveling salesman*. Princeton University Press, 2011.
- [11] A. Paliwal, F. Gimeno, V. Nair, Y. Li, M. Lubin, P. Kohli, and O. Vinyals, “Reinforced genetic algorithm learning for optimizing computation graphs,” in *International Conference on Learning Representations*, 2020. [Online]. Available: <https://openreview.net/forum?id=rkxDoJBYPB>
- [12] Y. Zhou, S. Roy, A. Abdolrashidi, D. Wong, P. Ma, Q. Xu, H. Liu, P. Phothilimthas, S. Wang, A. Goldie *et al.*, “Transferable graph optimizers for ML compilers,” *Advances in Neural Information Processing Systems*, vol. 33, pp. 13 844–13 855, 2020.
- [13] R. S. Sutton and A. G. Barto, *Reinforcement learning: An introduction*. MIT press, 2018.
- [14] G. Mena, D. Belanger, S. Linderman, and J. Snoek, “Learning latent permutations with gumbel-sinkhorn networks,” in *International Conference on Learning Representations*, 2018.
- [15] S. Linderman, G. Mena, H. Cooper, L. Paninski, and J. Cunningham, “Reparameterizing the Birkhoff polytope for variational permutation inference,” in *Proceedings of the International Conference on Artificial Intelligence and Statistics*, vol. 84, 09–11 Apr 2018, pp. 1618–1627. [Online]. Available: <https://proceedings.mlr.press/v84/linderman18a.html>
- [16] A. Gadetsky, K. Struminsky, C. Robinson, N. Quadrianto, and D. Vetrov, “Low-variance black-box gradient estimates for the plackett-luce distribution,” in *Proceedings of the AAAI Conference on Artificial Intelligence*, vol. 34, no. 06, 2020, pp. 10 126–10 135.
- [17] Z. Wu, S. Pan, F. Chen, G. Long, C. Zhang, and S. Y. Philip, “A comprehensive survey on graph neural networks,” *IEEE transactions on neural networks and learning systems*, vol. 32, no. 1, pp. 4–24, 2020.
- [18] P. W. Battaglia, J. B. Hamrick, V. Bapst, A. Sanchez-Gonzalez, V. Zambaldi, M. Malinowski, A. Tacchetti, D. Raposo, A. Santoro, R. Faulkner *et al.*, “Relational inductive biases, deep learning, and graph networks,” *arXiv preprint arXiv:1806.01261*, 2018.
- [19] V. Thost and J. Chen, “Directed acyclic graph neural networks,” in *International Conference on Learning Representations*, 2020.
- [20] M. Zhang, S. Jiang, Z. Cui, R. Garnett, and Y. Chen, “D-VAE: A variational autoencoder for directed acyclic graphs,” *Advances in Neural Information Processing Systems*, vol. 32, 2019.
- [21] M. Bianchini, M. Gori, and F. Scarselli, “Recursive processing of directed acyclic graphs,” in *Neural Nets WIRN Vietri-01*, 2002, pp. 96–101.
- [22] C. Ying, T. Cai, S. Luo, S. Zheng, G. Ke, D. He, Y. Shen, and T.-Y. Liu, “Do transformers really perform badly for graph representation?” *Advances in Neural Information Processing Systems*, vol. 34, 2021.

- 384 [23] R. Sato, “A survey on the expressive power of graph neural networks,” 2020. [Online].  
385 Available: <https://arxiv.org/abs/2003.04078>
- 386 [24] T. N. Kipf and M. Welling, “Semi-supervised classification with graph convolutional networks,”  
387 in *International Conference on Learning Representations*, 2017.
- 388 [25] P. Veličković, G. Cucurull, A. Casanova, A. Romero, P. Liò, and Y. Bengio, “Graph attention  
389 networks,” in *International Conference on Learning Representations*, 2018. [Online]. Available:  
390 <https://openreview.net/forum?id=rJXMpikCZ>
- 391 [26] R. Wang, Z. Hua, G. Liu, J. Zhang, J. Yan, F. Qi, S. Yang, J. ZHOU, and X. Yang, “A bi-level  
392 framework for learning to solve combinatorial optimization on graphs,” in *Advances in Neural  
393 Information Processing Systems*, 2021.
- 394 [27] A. Vaswani, N. Shazeer, N. Parmar, J. Uszkoreit, L. Jones, A. N. Gomez, Ł. Kaiser, and  
395 I. Polosukhin, “Attention is all you need,” *Advances in neural information processing systems*,  
396 vol. 30, 2017.
- 397 [28] R. Xiong, Y. Yang, D. He, K. Zheng, S. Zheng, C. Xing, H. Zhang, Y. Lan, L. Wang, and  
398 T. Liu, “On layer normalization in the transformer architecture,” in *International Conference on  
399 Machine Learning*. PMLR, 2020, pp. 10 524–10 533.
- 400 [29] J. L. Ba, J. R. Kiros, and G. E. Hinton, “Layer normalization,” in *NIPS Deep Learning  
401 Symposium*, 2016. [Online]. Available: <https://arxiv.org/pdf/1607.06450v1.pdf>
- 402 [30] R. J. Williams, “Simple statistical gradient-following algorithms for connectionist reinforcement  
403 learning,” *Machine learning*, vol. 8, no. 3, pp. 229–256, 1992.
- 404 [31] A. B. Kahn, “Topological sorting of large networks,” *Communications of the ACM*, vol. 5,  
405 no. 11, pp. 558–562, 1962.

## 406 Checklist

- 407 1. For all authors...
- 408 (a) Do the main claims made in the abstract and introduction accurately reflect the paper’s  
409 contributions and scope? [Yes] See section 5
- 410 (b) Did you describe the limitations of your work? [Yes]
- 411 (c) Did you discuss any potential negative societal impacts of your work? [No] We cannot  
412 foresee any possible negative impacts, due to the highly technical nature of the task  
413 under consideration.
- 414 (d) Have you read the ethics review guidelines and ensured that your paper conforms to  
415 them? [Yes]
- 416 2. If you are including theoretical results...
- 417 (a) Did you state the full set of assumptions of all theoretical results? [N/A]
- 418 (b) Did you include complete proofs of all theoretical results? [N/A]
- 419 3. If you ran experiments...
- 420 (a) Did you include the code, data, and instructions needed to reproduce the main experi-  
421 mental results (either in the supplemental material or as a URL)? [No] The code and  
422 the data are proprietary. We do include clear instructions on how our synthetic graph  
423 dataset is generated in the appendix.
- 424 (b) Did you specify all the training details (e.g., data splits, hyperparameters, how they  
425 were chosen)? [Yes] Please see the appendix for training details
- 426 (c) Did you report error bars (e.g., with respect to the random seed after running exper-  
427 iments multiple times)? [Yes] We report the standard deviation of the % gap from  
428 approximate DP and the run time for each method in the appendix
- 429 (d) Did you include the total amount of compute and the type of resources used (e.g., type  
430 of GPUs, internal cluster, or cloud provider)? [Yes] Please see the appendix for details  
431 on compute resources
- 432 4. If you are using existing assets (e.g., code, data, models) or curating/releasing new assets...
- 433 (a) If your work uses existing assets, did you cite the creators? [N/A]

- 434 (b) Did you mention the license of the assets? [N/A]  
435 (c) Did you include any new assets either in the supplemental material or as a URL? [N/A]  
436  
437 (d) Did you discuss whether and how consent was obtained from people whose data you're  
438 using/curating? [N/A]  
439 (e) Did you discuss whether the data you are using/curating contains personally identifiable  
440 information or offensive content? [N/A]  
441 5. If you used crowdsourcing or conducted research with human subjects...  
442 (a) Did you include the full text of instructions given to participants and screenshots, if  
443 applicable? [N/A]  
444 (b) Did you describe any potential participant risks, with links to Institutional Review  
445 Board (IRB) approvals, if applicable? [N/A]  
446 (c) Did you include the estimated hourly wage paid to participants and the total amount  
447 spent on participant compensation? [N/A]

# Appendix

## Table of Contents

|                                                         |           |
|---------------------------------------------------------|-----------|
| <b>A Layered graphs dataset</b>                         | <b>13</b> |
| <b>B Ablation studies</b>                               | <b>16</b> |
| B.1 Changing the Encoder . . . . .                      | 16        |
| B.2 Changing the Decoder . . . . .                      | 17        |
| <b>C Training and Model details</b>                     | <b>18</b> |
| C.1 Training . . . . .                                  | 18        |
| C.2 Model architecture . . . . .                        | 18        |
| C.3 Baselines . . . . .                                 | 18        |
| C.4 Baseline policy . . . . .                           | 19        |
| C.5 Input features and initial node embedding . . . . . | 19        |

## A Layered graphs dataset

We report here the details of the generation algorithm we use to create our dataset. It is not the first time that a synthetic dataset of graphs is used to train and test an ML framework on a compiler task, as this was already done in ref. [11]. However, the models therein used were generic random graph models (e.g. Erdos-Renyi), rather than a model explicitly tailored to reproduce NN-like computation graphs. We develop such a model, and we release its details with the intent of both ensuring reproducibility of our results, as well as of providing tool that we hope will be picked up by researchers interested in compiler problems, as well as more general sequence optimization task on DAGs.

The algorithm builds a graph by organizing a fixed number  $|V|$  of nodes into well-defined layers, and then placing edges between subsequent layers, as well as skip connections that skip at least one layer. While the number of nodes is fixed by the user, the target number of layers  $L$  depends on the *width factor*  $\mathcal{W}$  of the graph. A width factor of 0 would result in a one-dimensional chain graph, whilst a width factor of 1 in a graph with a single, wide layer,

$$L = \left\lceil \sqrt{|V| \left( \frac{1}{\mathcal{W}} - 1 \right)} \right\rceil, \quad (11)$$

where  $\lceil \cdot \rceil$  is the ceiling function. In order to promote architectural variability within the dataset, we choose to randomly draw a new width factor,  $\mathcal{W} \sim U(0.25, 0.5)$ , for each graph, with  $U(a, b)$  denoting the uniform distribution in the  $[a, b]$  interval. Subsequently, the number of nodes to assign to each layer  $\ell$  is also an integer randomly drawn from a uniform distribution

$$\mathcal{N}_\ell \sim U(\lceil |V|/L(1 - \sigma_{\mathcal{N}}) \rceil, \lfloor |V|/L(1 + \sigma_{\mathcal{N}}) \rfloor), \quad (12)$$

with  $\sigma_{\mathcal{N}}$  being a user-defined variability parameter, and  $\lfloor \cdot \rfloor$  is the floor function. We stress that both  $L$  and  $\mathcal{N}_\ell$  are just target values, since we wish to keep  $|V|$  fixed: this layer-by-layer node addition process is stopped as soon as the graph has the number of nodes  $|V|$  required, which might lead to the number of layers and nodes per layer being ultimately different from their respective targets. The pseudocode for this procedure is reported in algorithm 1.

After the layers are set up, the algorithm proceeds to assign edges between adjacent layers. As an example, let us assume that  $\mathcal{N}_1$  and  $\mathcal{N}_2$  are the numbers of nodes for two adjacent layers, with  $\mathcal{N}_2 < \mathcal{N}_1$ . The maximal number of edges between these two layers, corresponding to a fully-connected, MLP-like topology, would be  $\mathcal{N}_1 \times \mathcal{N}_2$ . Since we want each node to have at least one ingoing and one outgoing connection (except for those in the first and last layers), the minimal

---

**Algorithm 1:** Node-assignment algorithm for layered graphs.

---

**Output:** A layered graph  $G = (V, )$  without edges

**Input:** Total number of nodes  $|V|$ , number-of-nodes-per-layer variability  $\sigma_N$

**Data:** layer index  $\ell$ , node index  $n$ , node counter  $N$ , target number  $\mathcal{N}_\ell$  of nodes for layer  $\ell$

$\ell \leftarrow 0$ ;

$N \leftarrow 0$ ;

**while** *True* **do**

$\mathcal{N}_\ell \sim U(\lceil |V|/L(1 - \sigma_N) \rceil, \lfloor |V|/L(1 + \sigma_N) \rfloor)$ ;

**for**  $n \in [1, \mathcal{N}_\ell]$  **do**

**if**  $N \geq |V|$  **then**

**break**;

        add node  $n$  to graph  $G$ ;

        add node  $n$  to layer  $\ell$ ;

$N \leftarrow N + 1$ ;

**end**

$\ell \leftarrow \ell + 1$

**end**

---

493 number of connections must be  $\max(\mathcal{N}_1, \mathcal{N}_2) = \mathcal{N}_1$ . The user can interpolate between these two  
494 extrema by tuning the *edge density* parameter  $\rho_E$ , with the number of edges to place between the two  
495 layers being ultimately equal to

$$|E|_{(\ell_i, \ell_{i+1})} = (\mathcal{N}_{\ell_i} \times \mathcal{N}_{\ell_{i+1}}) \rho_E + (1 - \rho_E) \max(\mathcal{N}_{\ell_i}, \mathcal{N}_{\ell_{i+1}}). \quad (13)$$

496 This budget of edges is subsequently distributed among the nodes in the larger layer (layer 1 in our  
497 example), with them being assigned to the node with the smallest number of so-far-assigned edges  
498 (ties are broken randomly), until it is exhausted. What then remains to do is connecting all the so  
499 assigned edges to nodes in the other layer (layer 2 in our example above). We choose these destination  
500 nodes in a such a way that, if the layers were visualized as being centered one above the other, with  
501 the larger layer at the top, the edges assigned to a node end up more or less equally spaced in 2- $d$  cone  
502 below it. This procedure is repeated for every pair of adjacent layers, as we report in algorithm 2.

503 Skip connections, i.e. edges skipping at least one layer, which are often found in modern NN  
504 architectures, are then added to the graph. The total number of skip connections to add is fixed as

$$\mathcal{N}_S = |E| \frac{\rho_S}{(1 - \rho_S)}, \quad (14)$$

505 where  $|E|$  is the total number of edges in the graph so far, and  $\rho_S$  a user-defined skip connection  
506 density. For each skip connection, we randomly draw a source layer among those between the first  
507 and the third-to-final ones (since skip connections must skip at least one layer). The target layer  
508 number is then also drawn at random between the source layer number +2, and the final layer (both  
509 included). One must then assign a source and a target *node* within each of these layers. We just select  
510 the source node at random within the source layer, and then assign the target node in such a way  
511 that it would be more or less directly below the source node if the graph were visualized on a 2- $d$   
512 plane. The pseudocode of this procedure is reported in algorithm 3, and figure 4 shows three example  
513 instances of layered graphs created with our algorithm.

514 Finally, we specify the assignment of memory costs to the nodes. In the layered graph model, we  
515 have both output memory costs  $(m_i)_{i=1}^{|V|}$  and parameter costs  $(p_i)_{i=1}^{|V|}$ , where the output cost is the  
516 memory usage of the output of an operation, and the parameter cost the one of a variable necessary to  
517 execute the operation; for example, if the operation at node  $i$  were a matrix multiplication,  $\mathbf{y} = M\mathbf{x}$ ,  
518  $o_i$  would be the memory usage of  $\mathbf{y}$  and  $p_i$  the one of the matrix  $M$ . The parameter cost of operation  
519  $\sigma_t$  during a sequence is added to the memory usage at time  $t$ , but not to the cost at subsequent steps  
520 since the memory associated to it can be de-allocated as soon as the operation has been executed. In  
521 particular, the memory utilization cost  $M_t$  in (2) gets modified to the following:

$$M_t = I_{t-1} + m(\sigma_t) + p(\sigma_t) \quad (15)$$

522 where  $I_t$  is defined in (3). Both costs are randomly drawn from a simple mixture of Gaussians  
523 GMM( $\mathbf{w}, \mu, \sigma$ )  $\equiv \sum_{i=1}^4 w_i \mathcal{N}(\mu_i, \sigma_i)$ ,

$$m_i \sim \text{GMM}(\mathbf{w}, \mu, \sigma), \quad p_i \sim \text{GMM}(\mathbf{w}, \mu, \sigma). \quad (16)$$

---

**Algorithm 2:** Edge-assignment algorithm for layered graphs.

---

**Output:** A layered graph  $G = (V, E)$  with edges but no skip connections.

**Input:** A layered graph  $G = (V, )$  without edges, edge density  $\rho_E$

**Data:** Number  $|E|_{(\ell_i, \ell_j)}$  of edges between layers  $\ell_i$  and  $\ell_j$ .  $c_n$  is a counter of edges incoming or outgoing from node  $n$

```

for  $\ell_1 \in \text{graph layers}$  do
   $\ell_2 = \ell_1 + 1$ ;
   $|E|_{(\ell_1, \ell_2)} = (\mathcal{N}_{\ell_1} \times \mathcal{N}_{\ell_2})\rho_E + (1 - \rho_E) \max(\mathcal{N}_{\ell_1}, \mathcal{N}_{\ell_2})$  (rounded to the closest integer);
  if  $\mathcal{N}_{\ell_1} \geq \mathcal{N}_{\ell_2}$  then
     $\ell_s \leftarrow \ell_1, \ell_t \leftarrow \ell_2$ ;
  else
     $\ell_s \leftarrow \ell_2, \ell_t \leftarrow \ell_1$ ;
  end
  for  $n \in \ell_s$  do
     $c_n \leftarrow 0$ ;
  end
  while  $\sum_{n \in \ell_s} c_n < |E|_{(\ell_1, \ell_2)}$  do
     $\mathcal{S} \leftarrow \arg \min c_n$ ;
    Pick  $i$  randomly from set  $\mathcal{S}$ ;
     $c_i \leftarrow c_i + 1$ ;
  end
  for  $n \in [0, \mathcal{N}_{\ell_s} - 1]$  do
    if  $\mathcal{N}_{\ell_s} = 1$  then
       $n_c = 0$ ;
    else
       $n_c = n \times \frac{\mathcal{N}_{\ell_t} - 1}{\mathcal{N}_{\ell_s} - 1}$  set "center node," rounded to the nearest integer
    end
    for  $i \in [0, c_n - 1]$  do
       $n_t = (n_c - (c_n - 1)/2) + [0, c_n - 1]$  (a range centered at  $n_c$ );
      Shift the range  $n_t$  up/down such that no index is less than 0 or greater than  $\mathcal{N}_{\ell_t} - 1$ ;
      for  $j \in n_t$  do
        | add one edge between node  $n$  of layer  $\ell_s$  and node  $j$  of layer  $\ell_t$ 
      end
    end
  end
end
end

```

---

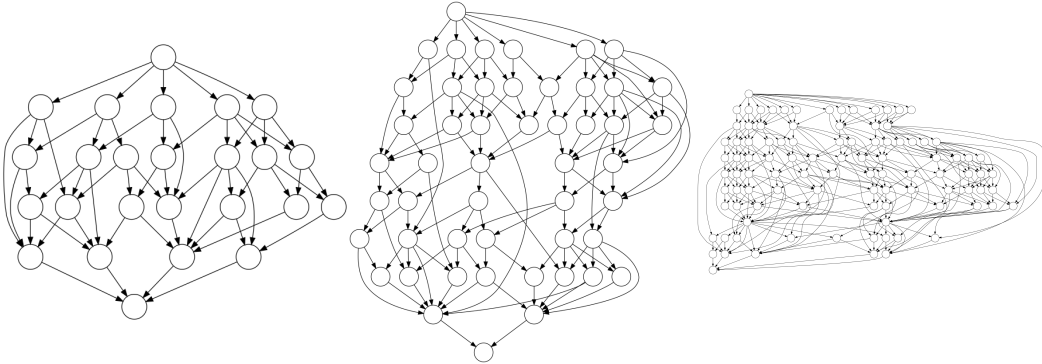

Figure 4: Three example graphs from the layered graph family with (from left) 25, 50, and 100 nodes, generated using the algorithm we describe in the text. One can clearly make out the layered structure and easily remark the presence of skip connections.

524 To align the costs assignment with the real world computation graphs, instead of sampling the memory  
 525 costs for each node  $n$ , we sample one output cost  $m_l$  and parameter cost  $p_l$  for each layer  $l$  and assign

---

**Algorithm 3:** Skip connection-assignment algorithm for layered graphs.

---

**Output:** A layered graph  $G = (V, E)$  with both connections between adjacent layers, and skip connections

**Input:** A layered graph  $G = (V, E)$  with edges between adjacent layers but no skip connections, skip connection density  $\rho_S$

**Data:** number of layers  $L$ , number of edges  $|E|$

```

if  $L < 3$  then
    break; /* cannot have skip connections with fewer than 3 layers */
 $\mathcal{N}_S = \lceil |E| \frac{\rho_S}{(1-\rho_S)} \rceil$ ;
for  $i \in [0, \mathcal{N}_S)$  do
     $\ell_s \leftarrow$  a layer at random between the first and third-to-last (both included);
     $\ell_t \leftarrow$  a layer at random between layer number  $\ell_s + 2$  and the last (both included);
     $x_s \sim U(0, 1)$ ;
     $y \sim U(0, 1)$ ;
     $x_t = x_s + 0.2 \times y$ ;
     $x_t = \min(x_t, 0.999)$ ; /* ensure that  $x_t \in [0, 1)$  */
    add an edge between node  $\lfloor x_s \mathcal{N}_{\ell_s} \rfloor$  of layer  $\ell_s$  and node  $\lfloor x_t \mathcal{N}_{\ell_t} \rfloor$  of layer  $\ell_t$ 
end

```

---

the costs  $m_l, p_l$  to each node in layer  $l$ . This is because many real world computation graphs are a tiled version of the original precedence graph of compute nodes where each node is broken down into a layer of nodes with similar shape and parameter requirements. This concludes the description of our dataset generation algorithm. For the sake of reproducibility, we report below the value we took for all the user-defined parameters mentioned in this section:

- Variability of number of nodes per layer  $\sigma_N = 0.75$
- Edge density  $\rho_E = 0.2$
- Skip connection density  $\rho_S = 0.14$
- Means of the Gaussian mixture  $(\mu_1, \mu_2, \mu_3, \mu_4) = (0.5, 1, 3, 5)$
- Standard deviations of the Gaussian mixture  $(\sigma_1, \sigma_2, \sigma_3, \sigma_4) = (0.5, 1, 1, 1)$
- Weights of the Gaussian mixture  $(w_1, w_2, w_3, w_4) = (0.3, 0.3, 0.3, 0.1)$

## B Ablation studies

In order to measure the effectiveness of our architecture we perform ablation experiments to study the effect of changing the encoder (Table 3), changing the decoder to an auto-regressive decoder and changing both the encoder and the decoder (Table 4).

### B.1 Changing the Encoder

We conduct experiments by using an MLP and fully connected transformer as an encoder architecture to quantify the effectiveness of our topoformer architecture. In order to align topoformer architecture with traditional GNNs, we also test the performance of topoformer architecture by changing its configuration such that message passing is only done on the edges and the corresponding backward edges of the input DAG. This can be achieved by setting the number of heads to be 0 for the graph obtained by removing the edges of the DAG from its TC, its backward version and the undirected graph of incomparable pair of nodes. We also tie the parameters of the heads corresponding to the forward edges and tie the parameters of the heads corresponding to the backward edges. We keep the decoder fixed to our non-autoregressive decoder for these experiments.

We train each model on the layered graph dataset of 500 node graphs. We evaluate the performance of the trained model on the test set (300 graphs) of 500 node and 1000 node graphs. We use a sample size and beam width of 16 for evaluation on both 500 and 1000 node graphs. The MLP and transformer use the same number of layers and hidden dimension as the topoformer specified in



Table 3: Comparison of different encoder architectures. Topoformer with MP (message passing) on DAG corresponds to forward and backward message passing only on the input DAG using topoformer.

| Algorithm                        | 500-node graphs        |                 | 1000-node graphs        |                 |
|----------------------------------|------------------------|-----------------|-------------------------|-----------------|
|                                  | % gap from approx. DP  | run time [s]    | % gap from approx. DP   | run time [s]    |
| MLP                              |                        |                 |                         |                 |
| ✓ Greedy                         | $8.31 \pm 0.76$        | $0.58 \pm 0.0$  | $2.95 \pm 0.48$         | $1.52 \pm 0.01$ |
| ✓ Sample                         | $4.41 \pm 0.50$        | $0.67 \pm 0.0$  | $0.68 \pm 0.35$         | $1.84 \pm 0.02$ |
| ✓ Beam search                    | $6.5 \pm 0.69$         | $2.47 \pm 0.01$ | $2.43 \pm 0.49$         | $7.62 \pm 0.07$ |
| Fully connected Transformer      |                        |                 |                         |                 |
| ✓ Greedy                         | $8.46 \pm 0.72$        | $0.69 \pm 0.01$ | $3.09 \pm 0.46$         | $1.3 \pm 0.01$  |
| ✓ Sample                         | $4.72 \pm 0.52$        | $0.8 \pm 0.01$  | $0.85 \pm 0.37$         | $1.55 \pm 0.02$ |
| ✓ Beam search                    | $6.52 \pm 0.72$        | $2.98 \pm 0.03$ | $2.09 \pm 0.47$         | $6.49 \pm 0.07$ |
| Topoformer with MP on DAG (Ours) |                        |                 |                         |                 |
| ✓ Greedy                         | $4.82 \pm 0.55$        | $0.73 \pm 0.01$ | $0.76 \pm 0.36$         | $1.62 \pm 0.02$ |
| ✓ Sample                         | $3.67 \pm 0.52$        | $0.85 \pm 0.01$ | $0.21 \pm 0.36$         | $1.99 \pm 0.02$ |
| ✓ Beam search                    | $3.68 \pm 0.57$        | $3.03 \pm 0.03$ | $0.35 \pm 0.37$         | $8.1 \pm 0.08$  |
| Full Topoformer (Ours)           |                        |                 |                         |                 |
| ✓ Greedy                         | $4.31 \pm 0.56$        | $1.04 \pm 0.01$ | $0.47 \pm 0.36$         | $1.51 \pm 0.01$ |
| ✓ Sample                         | $3.35 \pm 0.52$        | $1.21 \pm 0.01$ | <b>-0.01</b> $\pm 0.35$ | $1.8 \pm 0.02$  |
| ✓ Beam search                    | <b>3.08</b> $\pm 0.51$ | $4.15 \pm 0.02$ | $0.05 \pm 0.36$         | $7.4 \pm 0.07$  |

555 appendix C. We run the inference on our test set of 300 graphs 10 times for each model to be more  
556 precise in our run time calculations. We report the mean % gap from approximate DP and the mean  
557 run time across all the graphs and trials along with their 95% confidence interval.

558 Table 3 shows the performance of different encoder architectures. It can be observed that both  
559 versions of our topoformer architecture have a superior performance than MLP and fully connected  
560 transformer for both graph sizes. Moreover, full topoformer (message passing on all the seven graphs  
561 listed in section 4.1) has a better memory cost performance than topoformer with message passing  
562 only the forward and backward edges of the DAG. This shows the benefit of global message passing  
563 between all the nodes which is enabled by the full topoformer.

## 564 B.2 Changing the Decoder

565 We compare the performance of our architecture with the model which uses topoformer as an encoder  
566 but uses an auto-regressive decoder. We adapt the decoder designed for the TSP problem [6] for  
567 our memory-minimization problem. The decoder of [6] uses a notion of context node for decoding  
568 and at each decoding step using a series of multi-head attention with the context node arrives at  
569 the distribution of the next node to be selected for the order. We modify the masking procedure in  
570 the decoder of [6] to mask out all the nodes which are not present in the set of feasible next nodes  
571  $\mathcal{S}(\sigma_{1:t-1}, G)$ .

572 We also conduct an experiment by changing both the encoder and decoder by adapting the model of  
573 [6] to our problem. We adapt the auto-regressive decoder of [6] as described above. [6] uses a fully  
574 connected transformer as an encoder since the underlying graph in TSP is a fully connected graph.  
575 We modify the encoder of [6] to do message passing only on the edges of our input DAG so that it  
576 can exploit the topological structure of the graph in the encoding stage. We refer to this model as  
577 "GNN encoder + AR decoder" in table 4.

578 We train both the models: "GNN encoder + AR decoder" and "Topoformer + AR decoder" on the  
579 layered graph dataset of 500 node graphs. We evaluate the performance of the trained model on  
580 the test set (300 graphs) of 500 node and 1000 node graphs. We use a sample size and beam width  
581 of 16 for 500 node graphs and a sample size and beam width of 8 for 1000 node graphs. We use

Table 4: Comparison with Auto-regressive decoding

| Algorithm                       | 500-node graphs                   |                 | 1000-node graphs                  |                 |
|---------------------------------|-----------------------------------|-----------------|-----------------------------------|-----------------|
|                                 | % gap from approx. DP             | run time [s]    | % gap from approx. DP             | run time [s]    |
| GNN encoder + AR decoder        |                                   |                 |                                   |                 |
| ✓ Greedy                        | $6.13 \pm 0.58$                   | $1.66 \pm 0.01$ | $1.84 \pm 0.39$                   | $3.34 \pm 0.02$ |
| ✓ Sample                        | $4.71 \pm 0.56$                   | $1.76 \pm 0.01$ | $1.38 \pm 0.37$                   | $3.59 \pm 0.02$ |
| ✓ Beam search                   | $4.87 \pm 0.61$                   | $4.01 \pm 0.02$ | $2.09 \pm 0.41$                   | $7.90 \pm 0.05$ |
| Topoformer + AR decoder         |                                   |                 |                                   |                 |
| ✓ Greedy                        | $4.43 \pm 0.55$                   | $1.53 \pm 0.01$ | $0.53 \pm 0.35$                   | $3.05 \pm 0.02$ |
| ✓ Sample                        | $3.33 \pm 0.51$                   | $1.7 \pm 0.01$  | <b><math>0.05 \pm 0.35</math></b> | $3.38 \pm 0.02$ |
| ✓ Beam search                   | $3.14 \pm 0.52$                   | $4.27 \pm 0.04$ | $0.13 \pm 0.36$                   | $7.90 \pm 0.05$ |
| Topoformer + NAR decoder (Ours) |                                   |                 |                                   |                 |
| ✓ Greedy                        | $4.31 \pm 0.56$                   | $1.04 \pm 0.01$ | $0.47 \pm 0.36$                   | $1.53 \pm 0.01$ |
| ✓ Sample                        | $3.35 \pm 0.52$                   | $1.21 \pm 0.01$ | $0.09 \pm 0.35$                   | $1.78 \pm 0.01$ |
| ✓ Beam search                   | <b><math>3.08 \pm 0.51</math></b> | $4.15 \pm 0.02$ | $0.2 \pm 0.36$                    | $5.57 \pm 0.05$ |

a smaller sample size for 1000 node graphs due to GPU memory issues with the auto-regressive decoder approaches.

Table 4 shows the mean and the 95% confidence interval of the % gap from approximate DP and run time for the three approaches on 500 and 1000 node graphs. We note that the performance of topoformer with AR decoder is quite close to our model for both 500 and 1000 node graphs. However, our model can run inference 2x faster than topoformer with AR decoder on 1000 graphs nodes (in greedy mode). Also, our model outperforms the adaptation of [6] attention based GNN encoder and AR decoder to our problem both in terms of memory cost of sequence and run time. This shows the merit of our topoformer architecture over using a traditional GNN architecture which does message passing only on the input graph.

## C Training and Model details

### C.1 Training

We train our model using the ADAM optimizer with the initial learning rate of  $10^{-4}$  and learning rate decay factor of 0.996 per epoch. We use a batch size of 8 for training our model. The training and testing of our model is done on a single GPU (Nvidia Tesla V-100) with 32 GB memory.

### C.2 Model architecture

We use topoformer with number of layers  $n_{layers} = 4$ , embedding dimension  $d = 256$ , number of heads  $n_{heads} = 10$  for each MHA operation on the seven graphs listed in section 4.1 and the query and value dimension of 64 for each head of MHA. The MLP used in (5) consists of a linear layer ( $d_{input} = d_{output} = 256$ ) with GELU activation followed by another linear layer ( $d_{input} = d_{output} = 256$ ). The MLP used in (7) to generate the node priorities consists of a linear layer ( $d_{input} = d_{output} = 256$ ) with RELU activation followed by another linear layer ( $d_{input} = 256, d_{output} = 1$ ). In order to restrict the range of priority values, we also normalize the priorities of the nodes used for the decoding as follows:

$$\tilde{y}_i = \alpha \times \frac{y_i - \text{mean}(\mathbf{y})}{\text{std}(\mathbf{y})} \quad (17)$$

where  $\mathbf{y} = [y_1, y_2, \dots, y_{|V|}]$  and  $\alpha$  is a hyperparamter. We set  $\alpha = 5$  for our experiments.

### C.3 Baselines

We provide more details about the dynamic programming baselines used in our experiments to compare the performance of our model

- **Depth-First Dynamic Programming (DP).** Topological orders are generated in a depth-first manner (with backtracking) where next node is picked randomly among available candidates. Branch exploration is terminated if 1) the same set of nodes are in the partial sequence as a branch that has been already explored - only the lowest cost partial sequence is retained (dynamic programming approach), and 2) if the current partial cost is already higher than the lowest cost of any full sequence already found (cost increases monotonically). This algorithm will eventually find the global optimal order, though the run time for doing so is expected to be at least exponential in  $|V|$  [2]; it is however able to return at least one complete sequence in time  $O(|V| + |E|)$  [31] in the worst case, same as DFS. In our implementation, we set a wall time of one hour and pick the best complete path found. We observe that for our synthetic layered graphs, if the graph size is as small as  $|V| = 100$ , we can actually find the optimal sequence in most cases within the one hour budget. We ran this algorithm on a CPU machine with Intel(R) Xeon(R) W-2123 CPU @ 3.60GHz

- **Approximate DP.** We define the state space  $S$  as the space including a set of all nodes for each partial sequence (which *ignores* the ordering information) and the action space for each state as the space of all possible next-node choices at that state (based on the topological structure). As an example for the state representation, if there is a partial sequence  $5 \rightarrow 2 \rightarrow 4 \rightarrow 3 \rightarrow 1$ , the corresponding state is  $\{1, 2, 3, 4, 5\}$ . With the empty set  $\emptyset$  being an initial state (meaning that no node has been added), we consider a state transition model that adds an action (a node) to a state and creates a successor state. Specifically, we can partition  $S$  into  $S_0 \cup S_1 \cup \dots \cup S_{|V|}$ , where  $S_t$  is the space including a set of all nodes for each length- $t$  partial sequence (note that  $S_0 = \{\emptyset\}$ ). At every iteration  $t = 0, 1, \dots, |V| - 1$ , the algorithm takes  $S_t$  and assumes that we have (1) *the minimum cost* and (2) *the best partial sequence* for each state in  $S_t$ , where the minimum cost is over all feasible partial sequences corresponding to the state. Then, for each successor state in  $S_{t+1}$ , the algorithm computes the minimum cost and the best partial sequence for reaching out that state.

It should be noted that the algorithm gives an *exact* solution if the amount of time and memory resource is sufficient, e.g., an exact solution can be found for 100-node graphs. However, due to the practical resource limitation, we only keep top- $K$  elements of  $S_{t+1}$  for each iteration  $t$  based on costs. We use the beam size  $K = 100,000$  for all experiments, and Nvidia Tesla V-100 is used for parallel computation across multiple states for each iteration.

### C.4 Baseline policy

The baseline  $b(G)$  used in the policy gradient update is generated using the greedy rollout of the baseline policy. The baseline policy is also an instance of our model which is updated regularly during the course of training. At the end of each epoch, if the performance of the model being trained becomes better than the baseline model (in greedy inference mode) on a set of validation graphs then we copy the weights of the trained mode to the baseline model.

### C.5 Input features and initial node embedding

We use the following as the input features  $x_j$  for node  $j$ :

1. Output memory cost  $m_j$  and parameter memory cost  $p_j$
2. In-degree and out-degree of the node
3. Minimum and maximum distance (in terms of hop count) of the node from the source and target node

We normalize each entry of the input node feature across the nodes so that the features lie between 0 and 1 making it invariant with respect to the graph size. To be precise, the  $i^{th}$  entry of the normalized

657 input feature of node  $j$  is given as  $\bar{x}_j^i = \frac{x_j^i}{\max_n x_n^i}$ . Finally, the initial embedding  $h_j^0$  for node  $j$  is  
658 obtained by passing  $\bar{x}_j$  through a linear layer.
